# Supplementary material for: The WHO Maternal Near-Miss Approach and the Maternal Severity Index Model (MSI): Tools for Assessing the Management of Severe Maternal Morbidity
Source: PLoS One. 2012 Aug 29;7(8):e44129. doi: 10.1371/journal.pone.0044129 (PMC3430678; doi:10.1371/journal.pone.0044129)
Supplement: Appendix S1 — The Maternal Severity Index (MSI) Calculator (XLSX) [file pone.0044129.s001.xlsx]

## Sheet: MSI Calculator
		Maternal Severity Index (MSI) Calculator
		Instructions:
		(1) Enter the information at discharge of health facility or maternal death.
		(2) Indicate (tick) all conditions that were present during the stay in the health facility.		1		0
		Severity Status at arrival
			FALSE	0	0.287	0
		Associated conditions
			FALSE	0	-0.579	0			TRUE	1	FALSE	0
		Life-threatening conditions
		Cardiovascular dysfunction						Respiratory dysfunction
			FALSE	0	0	0			FALSE	0	0	0
			FALSE	0	0	0			FALSE	0	0	0
			FALSE	0	0	0			FALSE	0	0	0
			FALSE	0	0	0			FALSE	0	0	0
			FALSE	0	0	0			FALSE	0	0	0
			FALSE	0	0	0			FALSE	0	0	0
		Renal dysfunction						Coagulation/hematological dysfunction
			FALSE	0	0	0			FALSE	0	0	0
			FALSE	0	0	0			FALSE	0	0	0
			FALSE	0	0	0			FALSE	0	0	0
		Neurological dysfunction						Hepatic dysfunction
			FALSE	0	0	0			FALSE	0	0	0
			FALSE	0	0	0			FALSE	0	0	0
			FALSE	0	0	0		Uterine dysfunction
			FALSE	0	0	0			FALSE	0	-1.169	0
				0		0				0		0
		Maternal Severity Score: 0	CardioF	0				Maternal Severity Index: 0.1 %	RespF	0	MSI_Logit:	-7.54
				0	0.309	0					MSI	0.1
		Brazilian Network for Surveillance of Severe Maternal Morbidity. The WHO Maternal Near-Miss Approach and the Maternal Severity Index Model (MSI): tools for assessing the management of severe maternal morbidity. Plos One, 2012.									MSS_Logit	-6.134
											MSS_DeathProb	0.2

## Sheet: SMR Calculator
	SMR Calculator
	Instruction:																CAISM
	Enter the required information in the green boxes.						Performance assessment										3.15
																	9
							SMR: N.A.								Data analyzed		368
			Enter the mean MSI (%):												0
			Enter the observed number of deaths:				Performance Grade: N.A.							0.1	0.1
			Enter the population size:												0
							Precision of the assessment: N.A.										point	lower limit	upper limit	point	lower limit	upper limit	zones
			Expected number of deaths:	0													#DIV/0!	#DIV/0!	#DIV/0!	#DIV/0!	#DIV/0!	#DIV/0!	#DIV/0!
	Parameters used in the assessment																SMR	<0.50	0.50-0.80	0.81-1.24	1.25-2.0	>2.0
																Performance:		Very High	High	Intermediate	Low	Very Low				Performance:	#DIV/0!
	Grades of Performance			SMR				Precision	Number of performance									1	2	3	4	5				Precision of the assessment:	#DIV/0!
	Very High			<0.50					grades included in the range						Precision of the assessment:			High	only one zone
	High			0.50-0.80					SMR 95% CI									Moderate	two zones
	Intermediate			0.81-1.24				High	One									Low	three zones
	Low			1.25-2.00				Moderate	Two
	Very low			>2.00				Low	Three or more
																		a	b
																		c	d
																		0.1	-0.1
																		0	0
																	SMR:	#DIV/0!
																	Log RR=	#DIV/0!
																	sqrt Var(log(RR))=	#DIV/0!
																	lower	#DIV/0!
																	upper	#DIV/0!
																	lower	#DIV/0!
																	upper	#DIV/0!
